# Supplementary material for: Colorectal Cancer Presentation and Survival in Young Individuals: A Retrospective Cohort Study
Source: MDPI journal article supplement (doi:10.3390/cancers10120472), 2018-11-28

# Supplementary Materials: Colorectal Cancer Presentation and Survival in Young Individuals: A Retrospective Cohort Study

Mark B. Ulanja, Bryce D. Beutler, Mohit Rishi, Chioma Ogala, Darryll R. Patterson, Nageshwara Gullapalli and Santhosh Ambika

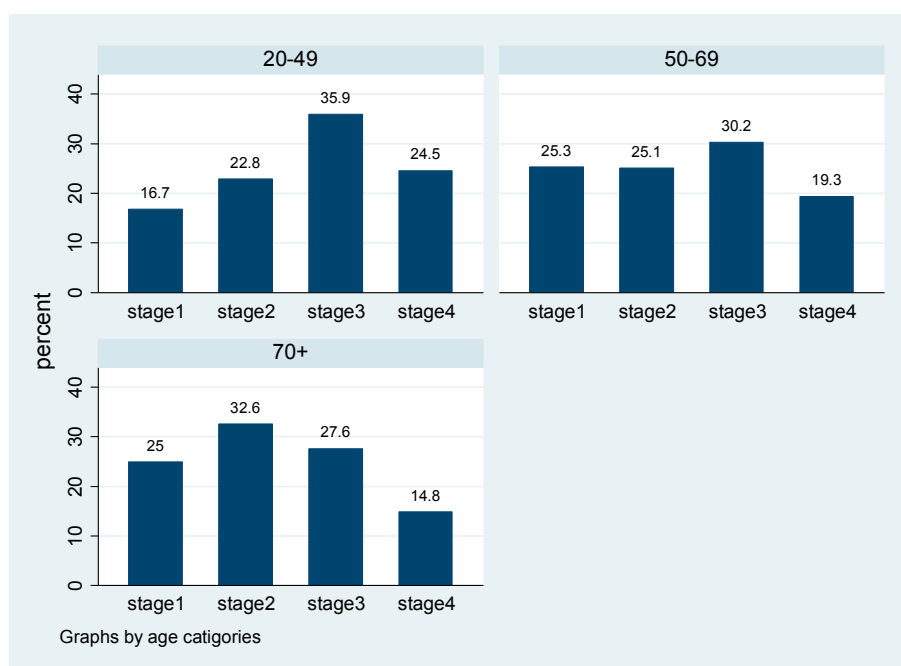

**Figure S1.** CRC stages and distribution by age group. 20–49 = age group 20–49, 50–69 = age group 50 to 69, 70+ = 70 years and older; stage = CRC stages.

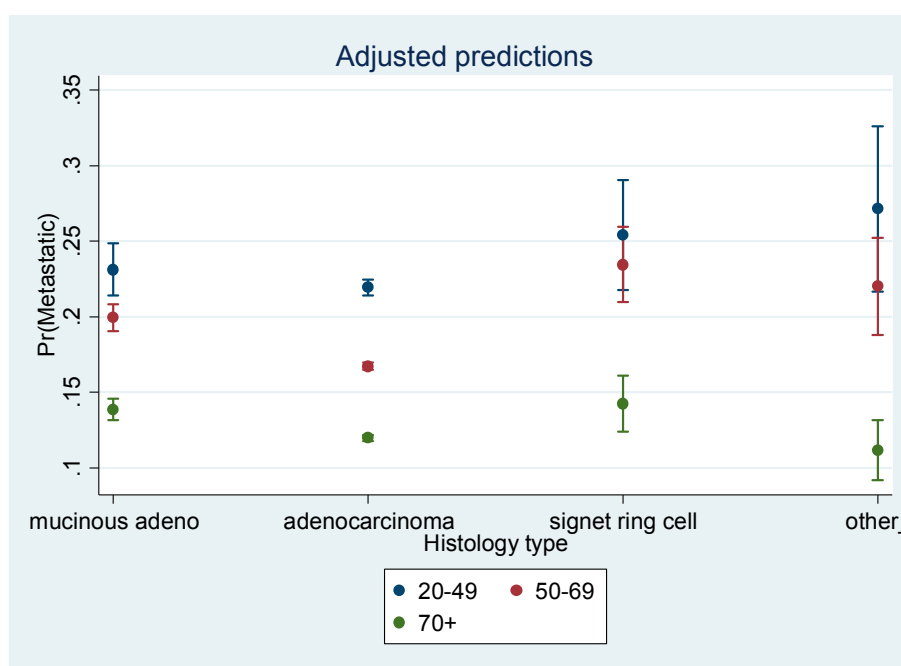

**Figure S2.** Predicted probabilities for age groups by CRC histology type. 20–49 = age group 20 to 49, 50–69 = age group 50 to 69, 70+ = 70 years and older; Pr (metastatic) = probability of presenting with

stage IV disease; Mucinous adeno = mucinous adenocarcinoma; adenocarcinoma = adenocarcinoma non otherwise specified; signet ring cell = signet ring cell carcinoma; and other = medullary carcinoma; enosquamous adenocarcinoma and mixed adenocarcinoma.

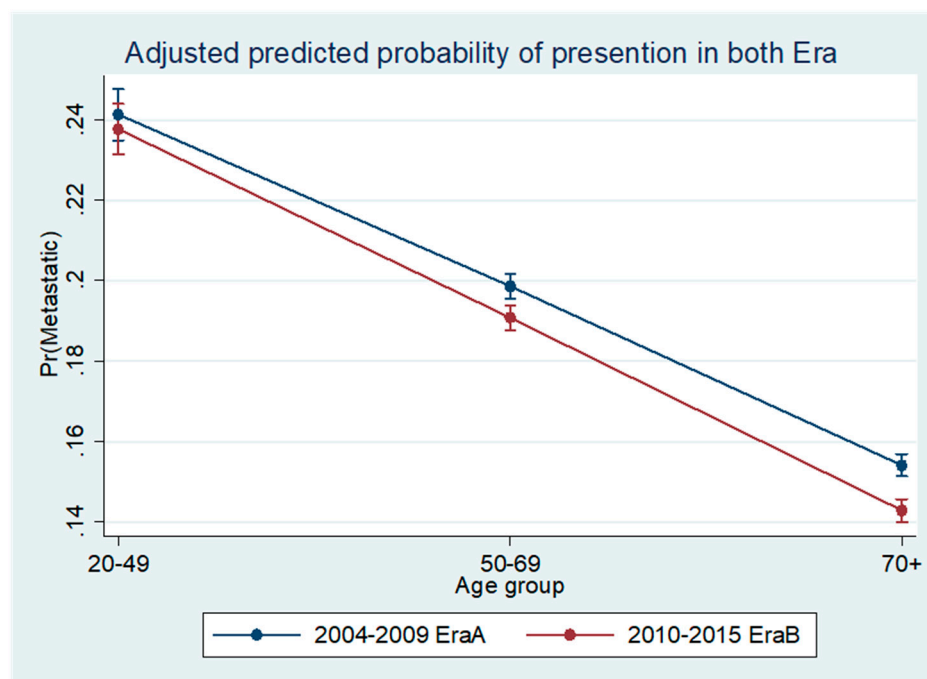

**Figure S3.** Adjusted Predicted probabilities of metastatic disease by age for EraA and EraB. Era A is 2004 to 2009; Era B is 2010 to 2015; Pr (metastatic) = probability of presenting with stage 4 disease.

**Table S1.** Hazard ratios (HR) of all-cause and CRC specific mortality in different age groups stratify by histology. HR= hazard ratio; NOS = Non Otherwise Specified.

| Colorectal Cancer                 | Age Groups        |                         |                         |
|-----------------------------------|-------------------|-------------------------|-------------------------|
|                                   | 20–49             | 50–69                   | 70 and older            |
| <b>All-cause mortality</b>        |                   |                         |                         |
| <b>Mucinous adenocarcinoma</b>    |                   |                         |                         |
| Adjusted HR                       | Reference (20–49) | 1.12 (1.04–1.21)        | 1.73 (1.61–1.87)        |
| <b>Adenocarcinoma NOS</b>         |                   |                         |                         |
| Adjusted HR                       | Reference (20–49) | 1.17 (1.14–1.20)        | 2.06 (2.01–2.11)        |
| <b>Signet ring cell carcinoma</b> |                   |                         |                         |
| Adjusted HR                       | Reference (20–49) | <b>1.20 (1.05–1.38)</b> | <b>1.43 (1.23–1.66)</b> |
| <b>Other</b>                      |                   |                         |                         |
| Adjusted HR                       | Reference (20–49) | 1.18 (0.93–1.50)        | 1.81 (1.42–2.31)        |
| <b>CRC-Specific Mortality</b>     |                   |                         |                         |
| <b>Mucinous adenocarcinoma</b>    |                   |                         |                         |
| Adjusted HR                       | Reference (20–49) | 1.01 (0.93–1.10)        | 1.20 (1.11–1.31)        |
| <b>Adenocarcinoma NOS</b>         |                   |                         |                         |
| Adjusted HR                       | Reference (20–49) | 1.05 (1.02–1.08)        | 1.46 (1.42–1.50)        |
| <b>Signet ring cell carcinoma</b> |                   |                         |                         |
| Adjusted HR                       | Reference (20–49) | 1.13 (0.99–1.31)        | 1.16 (0.99–1.36)        |
| <b>Other</b>                      |                   |                         |                         |
| Adjusted HR                       | Reference (20–49) | 1.12 (0.88–1.44)        | 1.47 (1.13–1.91)        |

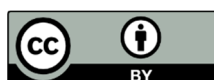

Supplement: s1 [file s1]
